# Supplementary material for: Simple Gd3+-Neu5NAc complexation results in NMR chemical shift asymmetries of structurally equivalent complex-type N-glycan branches
Source: Royal Society of Chemistry journal article supplement (doi:10.1039/c7an00817a), 2017-01-01
Supplement: c7an00817a1.pdf [file c7an00817a1.pdf]

SUPPLEMENTARY INFORMATION

**Simple Gd<sup>3+</sup>-Neu5NAc complexation results in NMR chemical shift asymmetries  
of structurally equivalent complex-type N-glycan branches**

Konstantin Usachev,<sup>a</sup> Yoshiki Yamaguchi,<sup>b</sup> Masayuki Takamatsu,<sup>c</sup> Nataliya Pavlova,<sup>a</sup>  
Vladimir Klochkov,<sup>a</sup> Almira Kurbangalieva,<sup>d</sup> Takefumi Murase,<sup>e</sup> Taiji Shimoda<sup>e</sup> and  
Katsunori Tanaka\*<sup>c,d,e</sup>

<sup>a</sup> *NMR Laboratory, Institute of Physics, Kazan Federal University, 18 Kremlevskaya street, Kazan 420008, Russia*

<sup>b</sup> *Structural Glycobiology Team, Systems Glycobiology Research Group, RIKEN Global Research Cluster, RIKEN, Hirosawa, Wako-shi, Saitama 351-0198, Japan*

<sup>c</sup> *Biofunctional Synthetic Chemistry Laboratory, RIKEN, Hirosawa Wako-shi, Saitama 351-0198, Japan*

<sup>d</sup> *Biofunctional Chemistry Laboratory, A. Butlerov Institute of Chemistry, Kazan Federal University, 18 Kremlyovskaya street, Kazan 420008, Russia*

<sup>e</sup> *GlycoTargeting Research Team, RIKEN, 2-1 Hirosawa, Wako-shi, Saitama 351-0198, Japan*

\*Correspondence: Dr. Katsunori Tanaka, E-mail: [kotzenori@riken.jp](mailto:kotzenori@riken.jp)

## Experimental details

*NMR spectroscopy:* All measurements were acquired on a Bruker AVANCE-III HD 700 spectrometer ( $^1\text{H}$  frequency: 700.13 MHz) equipped with a 5 mm QCI (quadruple resonance  $^1\text{H}/^{13}\text{C}/^{15}\text{N}/^{31}\text{P}$ ) CryoProbe<sup>TM</sup>. NMR samples contained 200 micrograms of *N*-glycan in 300 microliters  $\text{D}_2\text{O}$  in a 5 mm Shigemi NMR tube. The temperature was set to 293 K. Two-dimensional (2D) proton (COSY, TOCSY, NOESY) spectra were acquired in the phase-sensitive mode using the States-TPPI method for TOCSY and the QF mode for COSY experiments, using a time domain data point density of 512  $t_1$  x 4096  $t_2$  complex points and 64 transients per complex  $t_1$  increment. 2D  $^1\text{H}$ - $^{13}\text{C}$  HSQC,  $^1\text{H}$ - $^{13}\text{C}$  HSQC-TOCSY, and  $^1\text{H}$ - $^{13}\text{C}$  HMBC spectra were recorded over 512 ( $^1\text{H}$ ) x 4096 ( $^{13}\text{C}$ ) complex points to obtain spectral widths of 13 ( $^1\text{H}$ ) and 165 ppm ( $^{13}\text{C}$ ). The NOESY mixing time was 150 ms.

Spectra were processed by NMRPipe<sup>13</sup> and analyzed using SPARKY. Proton and carbon resonance assignment for all residues were obtained using a combination of 2D COSY and TOCSY experiments for the  $^1\text{H}$  signals, and by 2D  $^1\text{H}$ - $^{13}\text{C}$  HSQC,  $^1\text{H}$ - $^{13}\text{C}$  HSQC-TOCSY, and  $^1\text{H}$ - $^{13}\text{C}$  HMBC for the  $^{13}\text{C}$  signals, as well as with reference to the chemical shift data obtained from undecasaccharides reported previously by Sato and Kajihara.<sup>11</sup>

The assignment of the  $\text{Gd}^{3+}$  interacting residues was performed based on the observed magnitude of the chemical shift changes. The carbon-bonded protons closest to the  $\text{Gd}^{3+}$  site generally provided the largest chemical shift changes, in ppm.

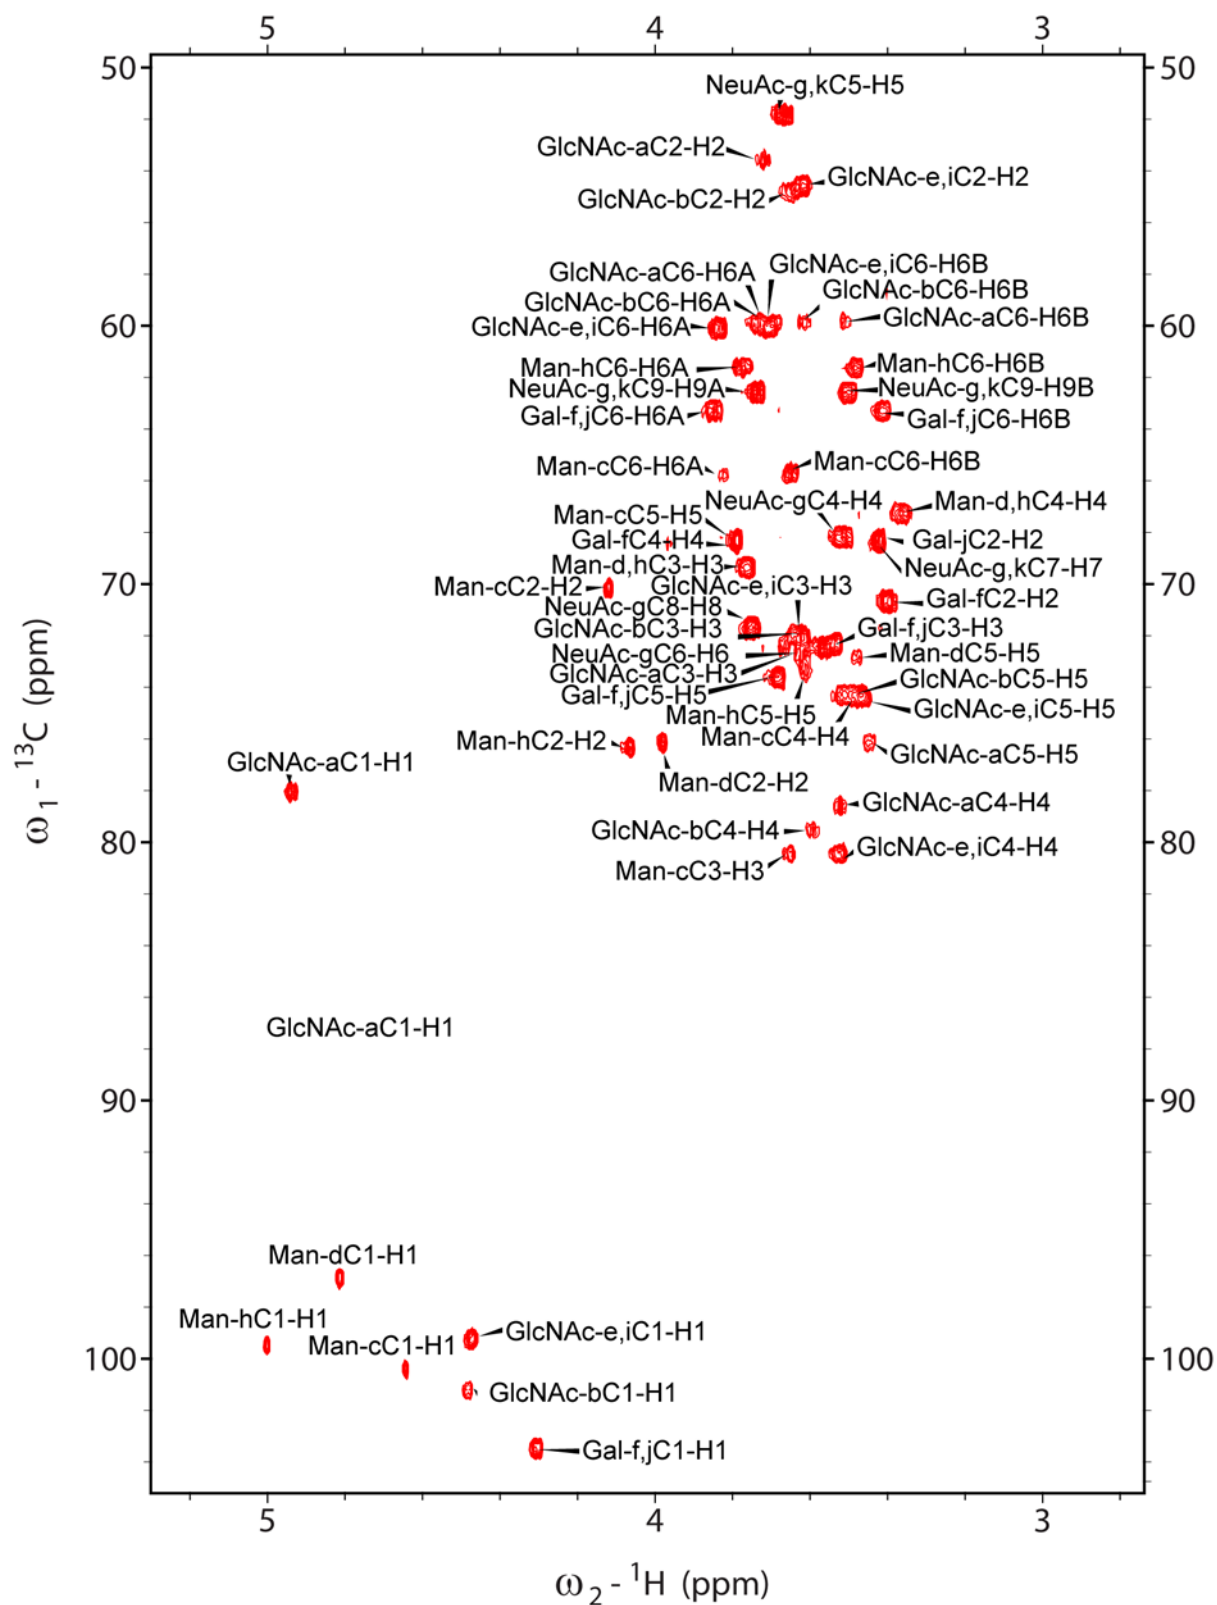

**Figure S1.**  $^1\text{H}$ - $^{13}\text{C}$  HSQC NMR ( $^1\text{H}$ : 700 MHz) spectra of disialo-*N*-glycan labeled with DOTA, 1-DOTA at 293K in  $\text{D}_2\text{O}$  solution.

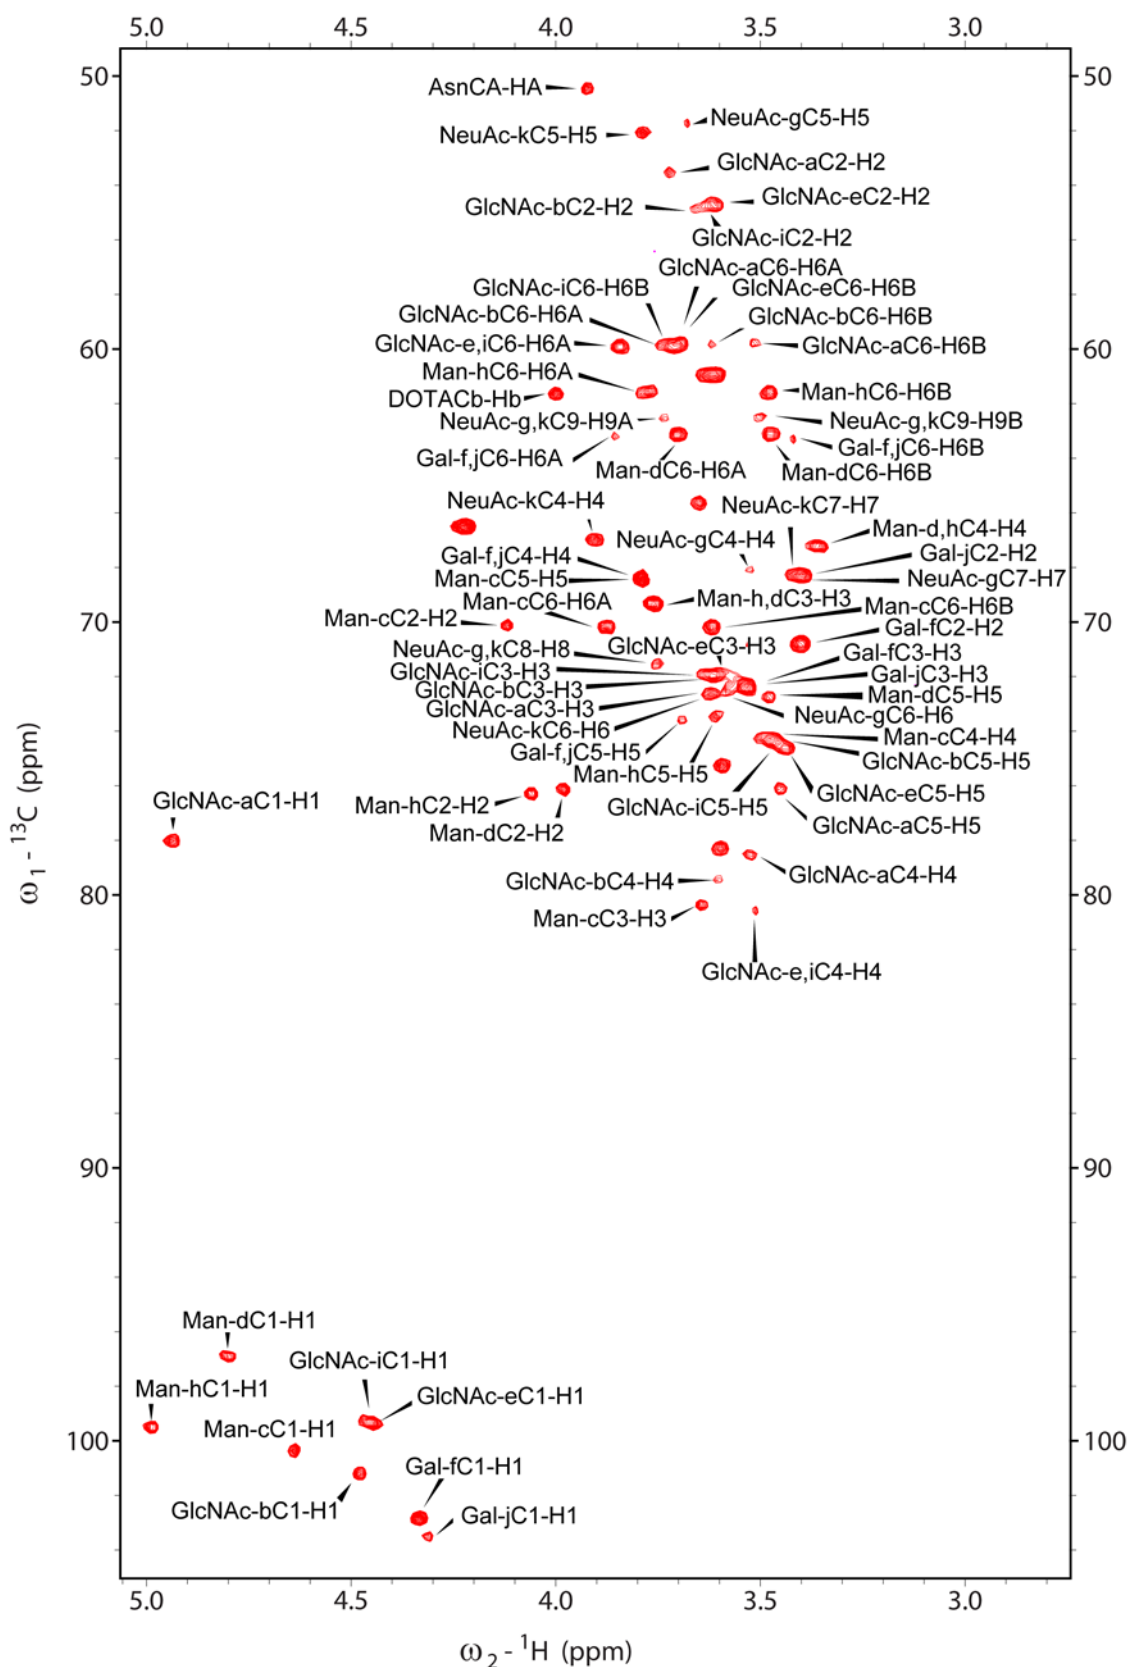

**Figure S2.**  $^1\text{H}$ - $^{13}\text{C}$  HSQC NMR ( $^1\text{H}$ : 700 MHz) spectra of disialo-*N*-glycan labeled with DOTA, **1-DOTA** at 293K in  $\text{D}_2\text{O}$  solution after the addition of  $\text{Gd}^{3+}$ .

**Table S1.**  $^1\text{H}$  and  $^{13}\text{C}$  chemical shifts in ppm measured in  $\text{D}_2\text{O}$  for **1-DOTA** with  $\text{Gd}^{3+}$  at 293 K.

| Functional group and its positions | $^1\text{H}$ (ppm) | $^{13}\text{C}$ (ppm) | Functional group and its positions | $^1\text{H}$ (ppm) | $^{13}\text{C}$ (ppm) |
|------------------------------------|--------------------|-----------------------|------------------------------------|--------------------|-----------------------|
| Asn H                              | 8.34               |                       |                                    |                    |                       |
| $\alpha$                           | 3.85               | 50.77                 |                                    |                    |                       |
| $\beta$                            | 2.79               | 34.88                 |                                    |                    |                       |
| GlcNAc-a 1                         | 4.95               | 77.97                 | Man-h 1                            | 4.99               | 99.50                 |
| 2                                  | 3.73               | 53.55                 | 2                                  | 4.07               | 76.30                 |
| 3                                  | 3.63               | 72.71                 | 3                                  | 3.77               | 69.31                 |
| 4                                  | 3.53               | 78.49                 | 4                                  | 3.36               | 67.16                 |
| 5                                  | 3.46               | 76.12                 | 5                                  | 3.63               | 73.46                 |
| 6A                                 | 3.72               | 59.84                 | 6A                                 | 3.78               | 61.60                 |
| 6B                                 | 3.52               | 59.84                 | 6B                                 | 3.49               | 61.60                 |
| GlcNAc-b 1                         | 4.48               | 101.20                | Gal-f 1                            | 4.34               | 102.90                |
| 2                                  | 3.66               | 54.87                 | 2                                  | 3.41               | 70.87                 |
| 3                                  | 3.61               | 71.91                 | 3                                  | 3.55               | 72.35                 |
| 4                                  | 3.61               | 79.51                 | 4                                  | 3.80               | 68.47                 |
| 5                                  | 3.49               | 74.24                 | 5                                  | 3.68               | 73.54                 |
| 6A                                 | 3.75               | 59.86                 | 6A                                 | 3.70               | 63.22                 |
| 6B                                 | 3.63               | 59.86                 | 6B                                 | 3.46               | 63.22                 |
| GlcNAc-e 1                         | 4.42               | 99.51                 | Gal-j 1                            | 4.31               | 103.50                |
| 2                                  | 3.62               | 54.74                 | 2                                  | 3.40               | 68.35                 |
| 3                                  | 3.62               | 71.91                 | 3                                  | 3.53               | 72.35                 |
| 4                                  | 3.53               | 80.61                 | 4                                  | 3.79               | 68.47                 |
| 5                                  | 3.46               | 74.56                 | 5                                  | 3.69               | 73.54                 |
| 6A                                 | 3.85               | 59.87                 | 6A                                 | 3.69               | 63.22                 |
| 6B                                 | 3.71               | 59.87                 | 6B                                 | 3.49               | 63.22                 |
| GlcNAc-i 1                         | 4.47               | 99.31                 | NeuNAc-g 3a                        | 2.54               | 39.99                 |
| 2                                  | 3.62               | 54.74                 | 3b                                 | 1.60               | 39.99                 |
| 3                                  | 3.62               | 71.91                 | 4                                  | 3.53               | 68.14                 |
| 4                                  | 3.53               | 80.61                 | 5                                  | 3.68               | 51.83                 |
| 5                                  | 3.46               | 74.56                 | 6                                  | 3.62               | 72.68                 |
| 6A                                 | 3.85               | 59.87                 | 7                                  | 3.42               | 68.37                 |
| 6B                                 | 3.71               | 59.87                 | 8                                  | 3.76               | 71.63                 |
|                                    |                    |                       | 9a                                 | 3.74               | 62.52                 |
|                                    |                    |                       | 9b                                 | 3.52               | 62.52                 |
| Man-c 1                            | 4.64               | 100.40                | NeuNAc-k 3a                        | 2.12               | 39.29                 |
| 2                                  | 4.13               | 70.12                 | 3b                                 | 1.71               | 39.29                 |
| 3                                  | 3.65               | 80.44                 | 4                                  | 3.90               | 67.22                 |
| 4                                  | 3.48               | 74.34                 | 5                                  | 3.79               | 52.14                 |
| 5                                  | 3.80               | 68.47                 | 6                                  | 3.60               | 72.28                 |
| 6A                                 | 3.83               | 65.73                 | 7                                  | 3.43               | 68.37                 |
| 6B                                 | 3.66               | 65.73                 | 8                                  | 3.86               | 70.13                 |
|                                    |                    |                       | 9a                                 | 3.78               | 60.48                 |
|                                    |                    |                       | 9b                                 | 3.70               | 60.48                 |
| Man-d 1                            | 4.80               | 96.93                 |                                    |                    |                       |
| 2                                  | 3.99               | 76.17                 |                                    |                    |                       |
| 3                                  | 3.77               | 69.31                 |                                    |                    |                       |
| 4                                  | 3.37               | 67.19                 |                                    |                    |                       |
| 5                                  | 3.49               | 72.64                 |                                    |                    |                       |
| 6A                                 | 3.71               | 63.15                 |                                    |                    |                       |
| 6B                                 | 3.48               | 63.15                 |                                    |                    |                       |

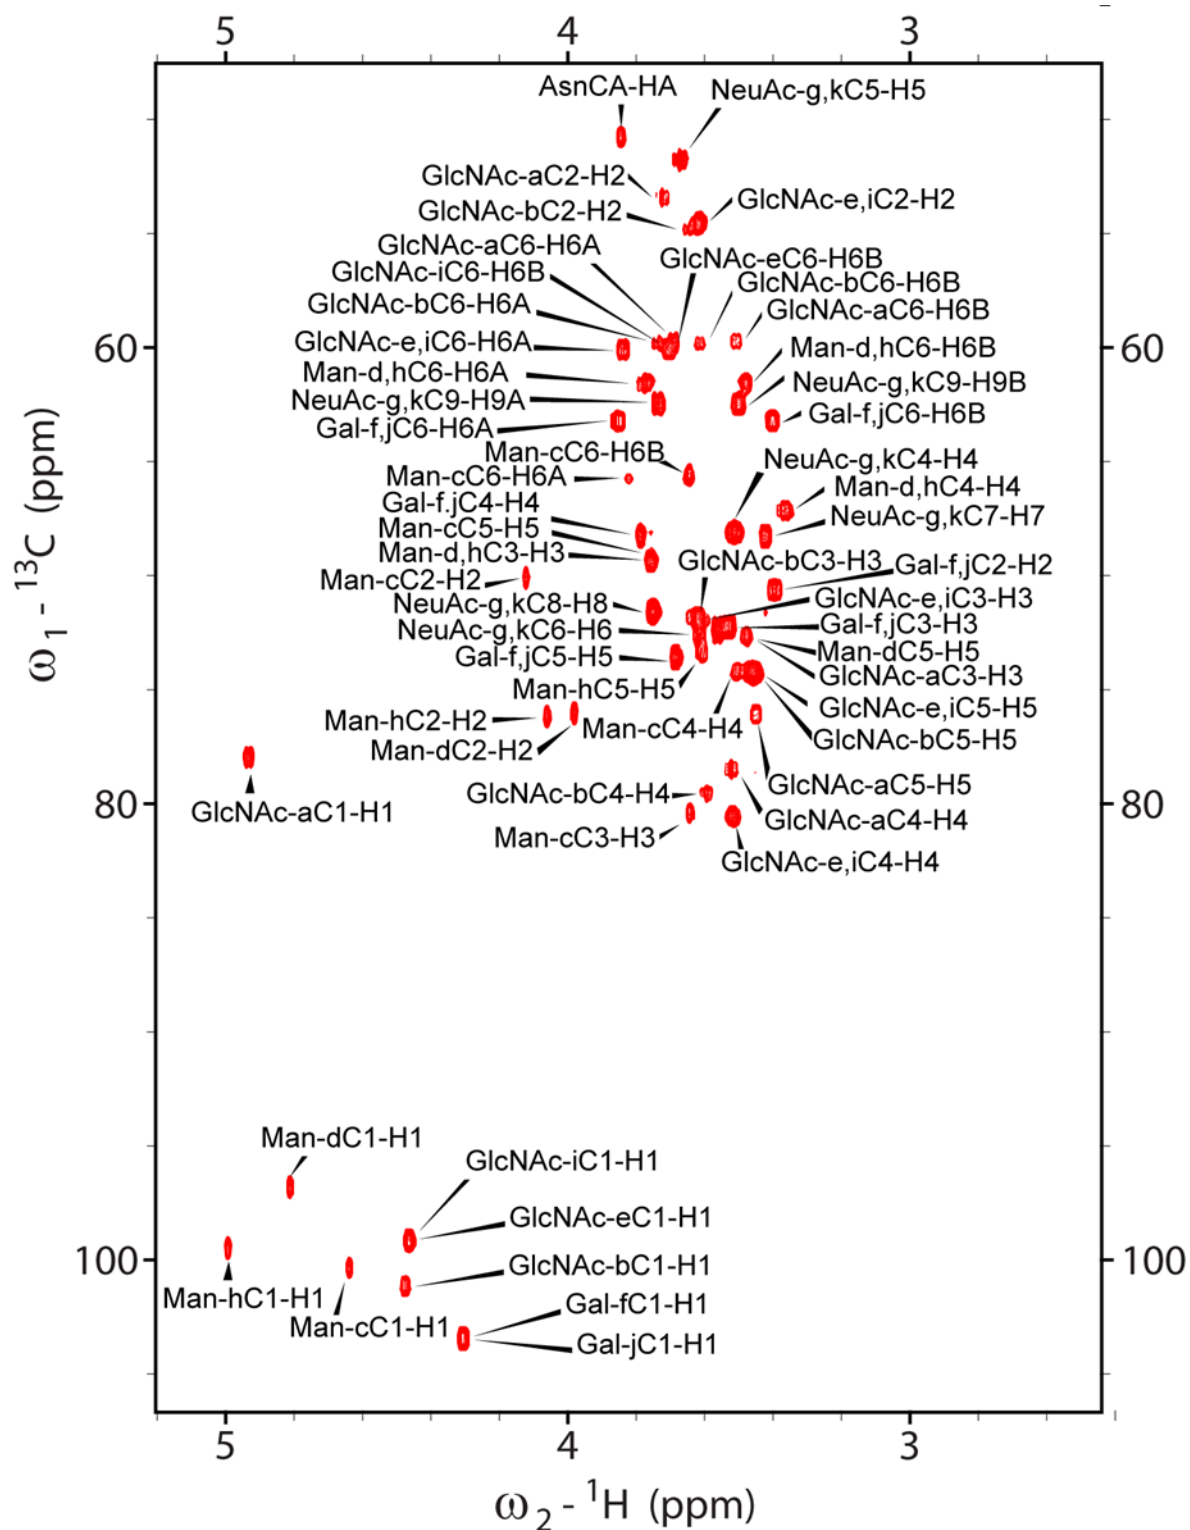

**Figure S3.**  $^1\text{H}$ - $^{13}\text{C}$  HSQC NMR ( $^1\text{H}$ : 700 MHz) spectra of disialo-*N*-glycan **1** at 293K in  $\text{D}_2\text{O}$  solution.



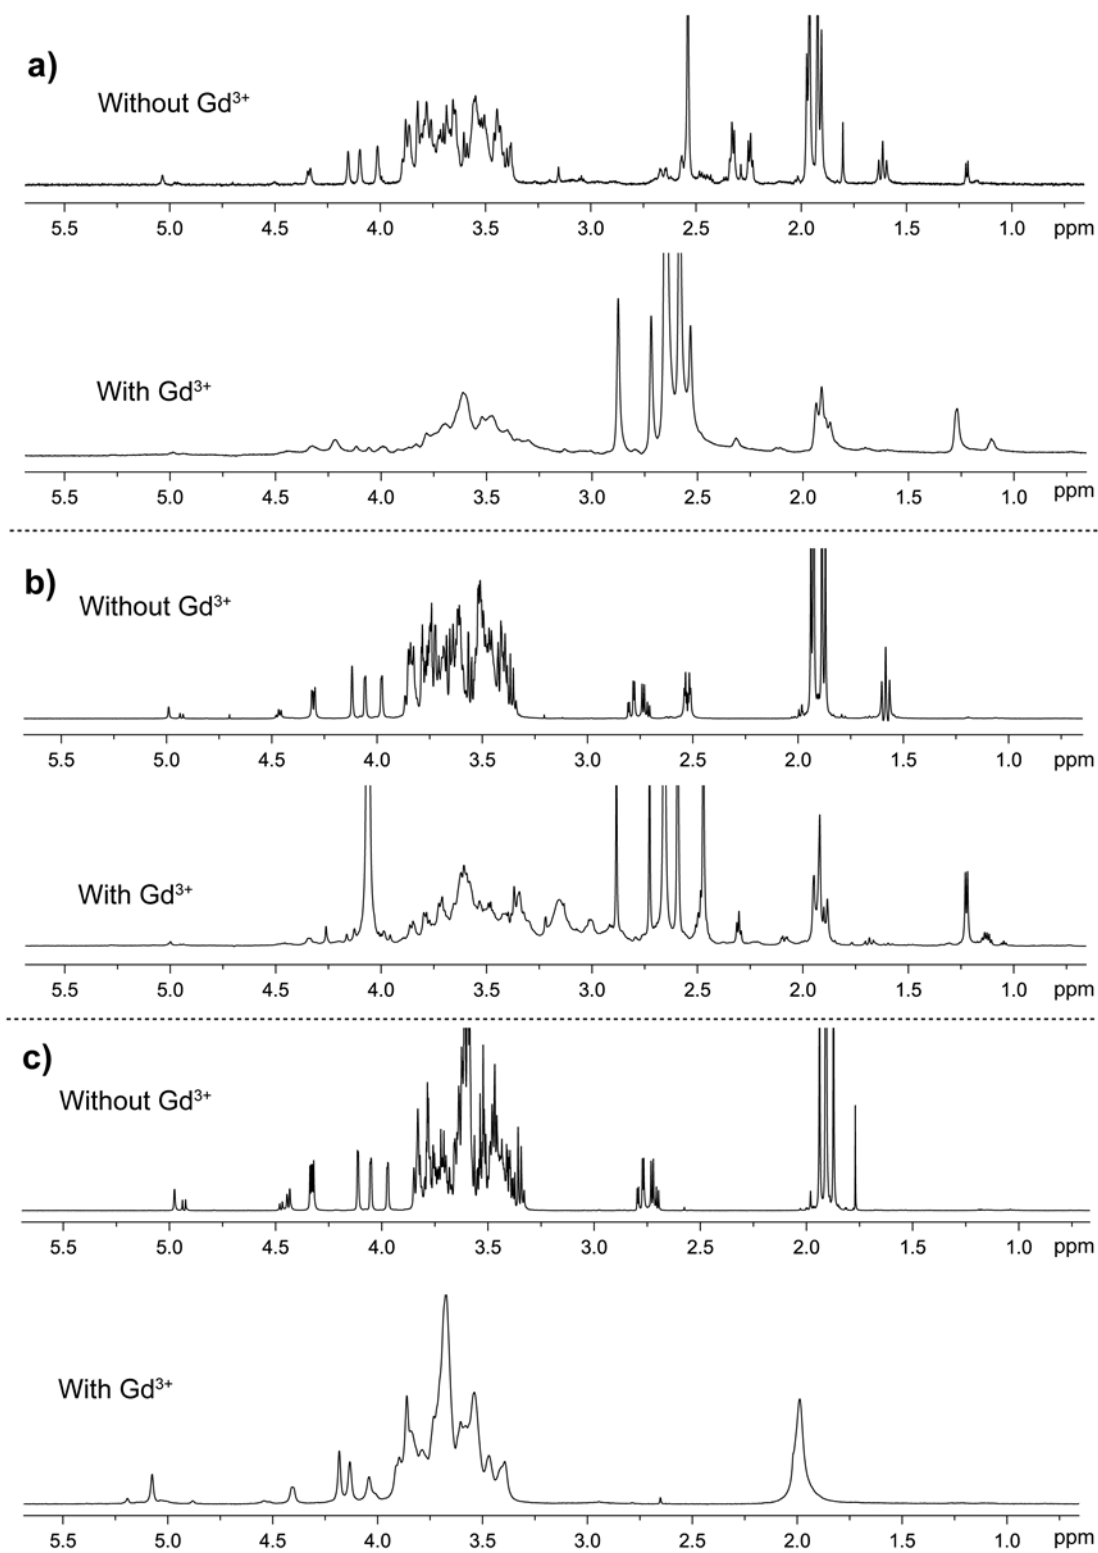

**Figure S5.**  $^1\text{H}$  NMR (700 MHz) spectra of the *N*-glycans at 293K in  $\text{D}_2\text{O}$  solution and after the addition of  $\text{Gd}^{3+}$ . (a) Disialo-*N*-glycan labeled with DOTA, **1-DOTA**; (b) disialo-*N*-glycan **1**; (c) asialo-*N*-glycan **2**.



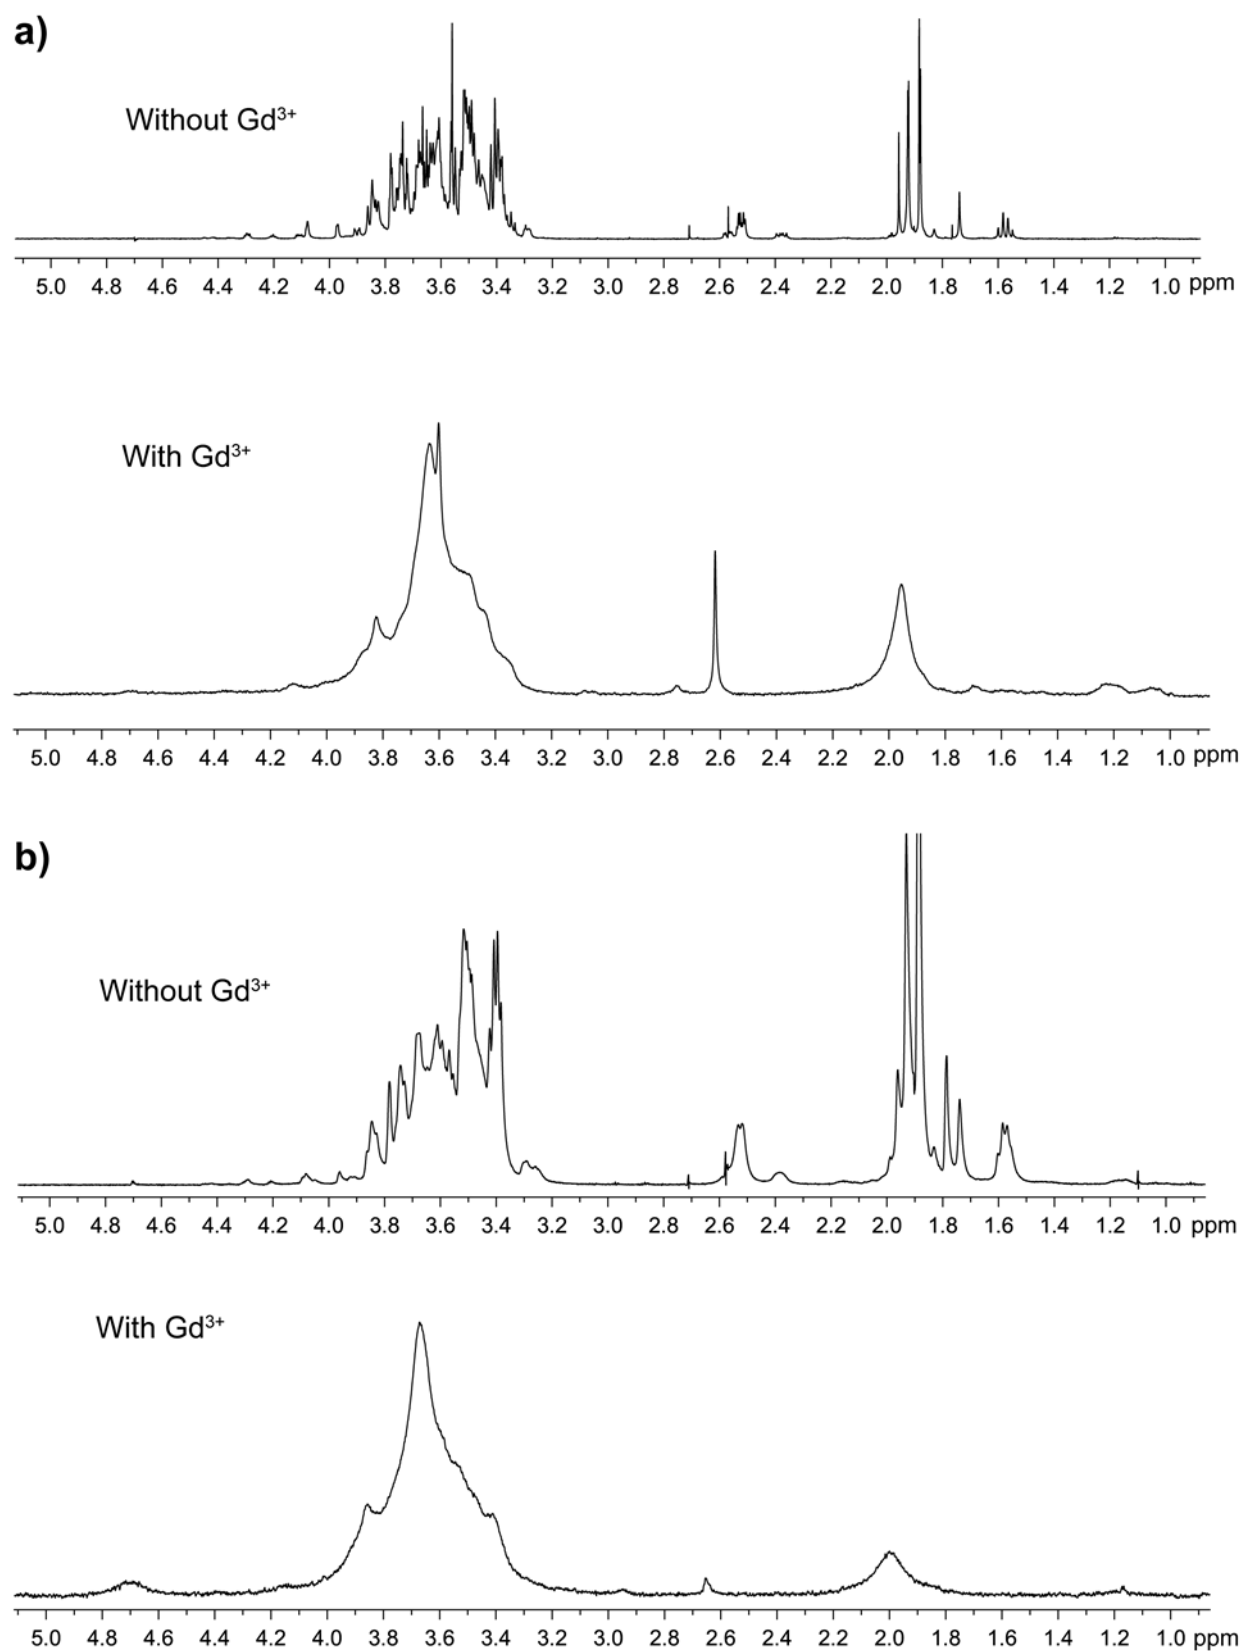

**Figure S6.** <sup>1</sup>H NMR (700 MHz) spectra of the *N*-glycans at 293K in D<sub>2</sub>O solution and after the addition of Gd<sup>3+</sup>. (a) Tri-antennary sialo-*N*-glycan **3**; and (b) tetra-antennary sialo-*N*-glycan **4**.
